# Supplementary material for: Endosomal recycling inhibitors downregulate estrogen receptor-alpha and synergise with endocrine therapies
Source: Springer Nature journal article supplement (doi:10.1007/s10549-023-07225-2), 2024-01-16

Figure S1

A

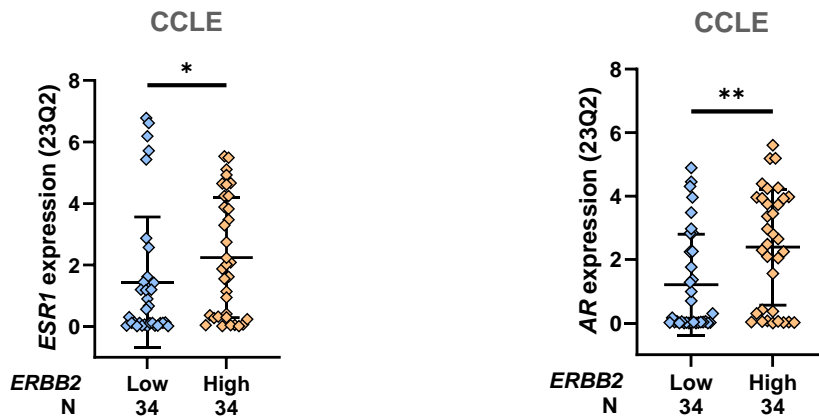

B

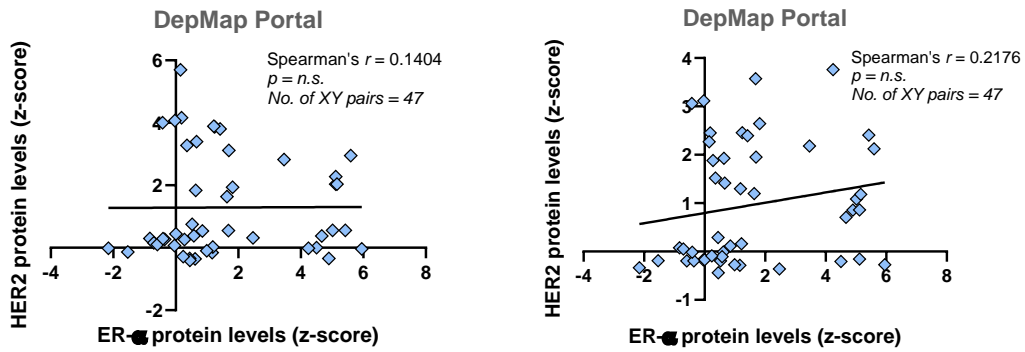

C

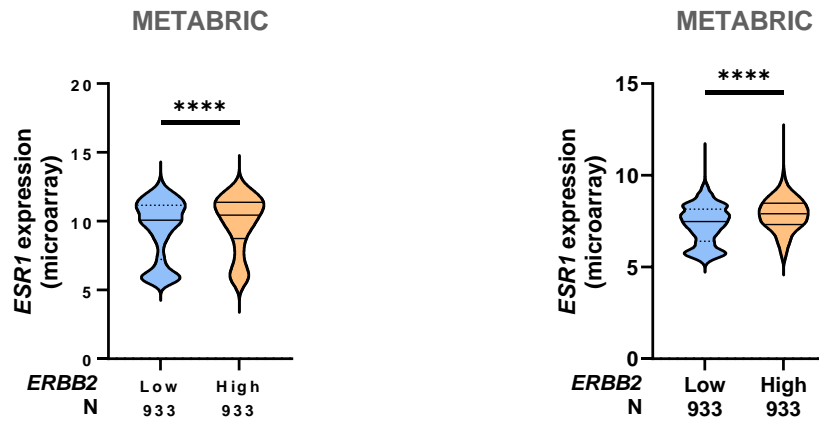

Figure S2

A

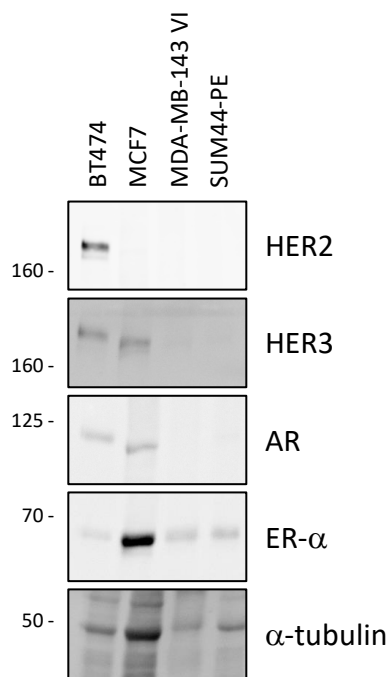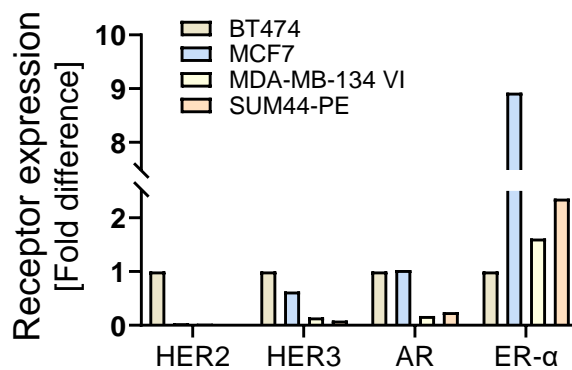

B

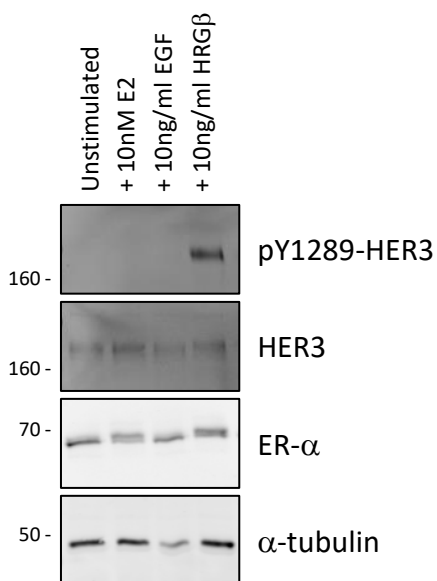

Figure S3

MCF-7

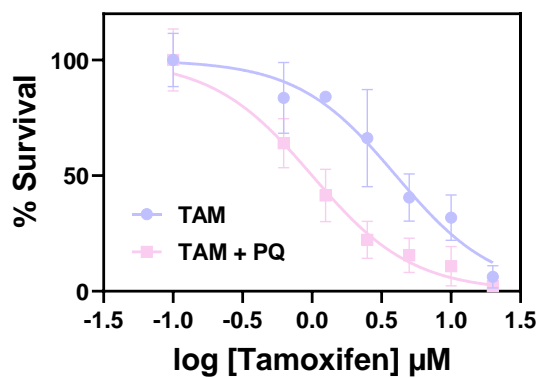

MCF-7

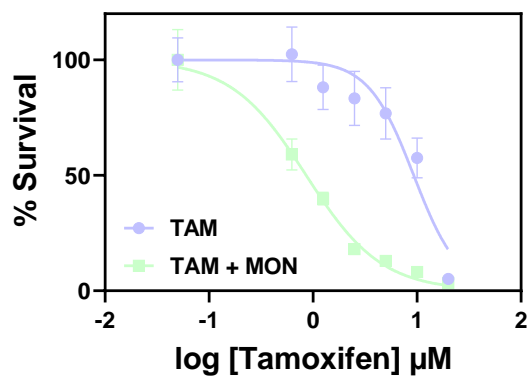

MDA-MB-134 VI

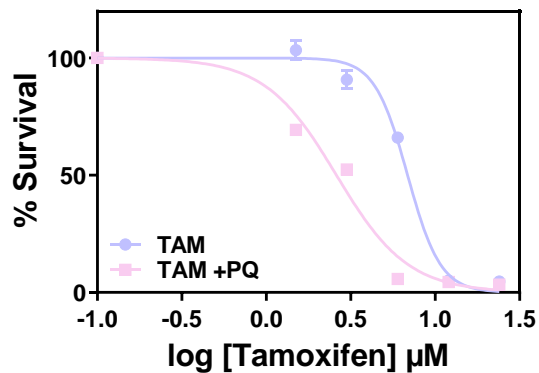

SUM44-PE

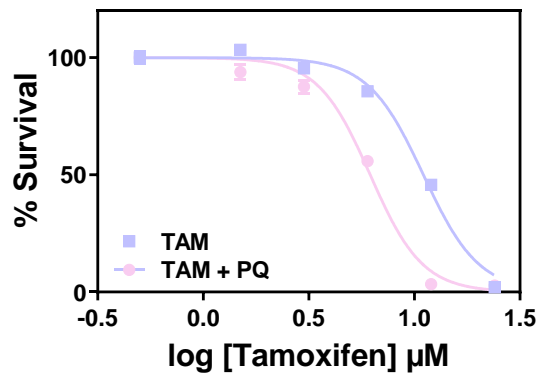

Supplement: MOESM1 [file 26631858]
